# Supplementary material
Source: Springer Nature journal article supplement (https://www.springermedizin.de/resource/supplementary/12931_2010_1057_MOESM4_ESM.pdf/9425540)

**A**

Normoxia

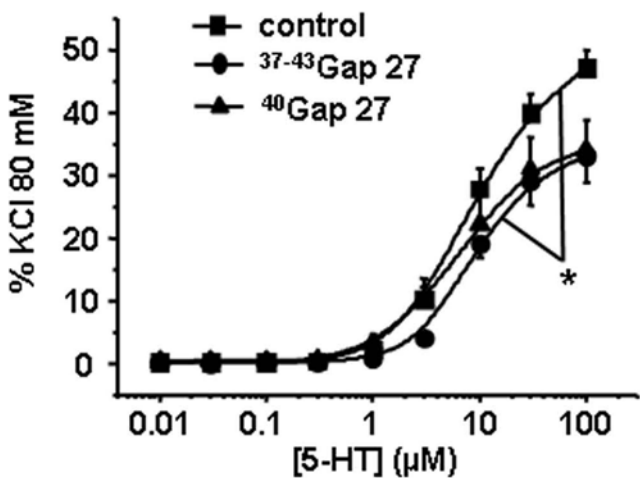**B**

Chronic hypoxia

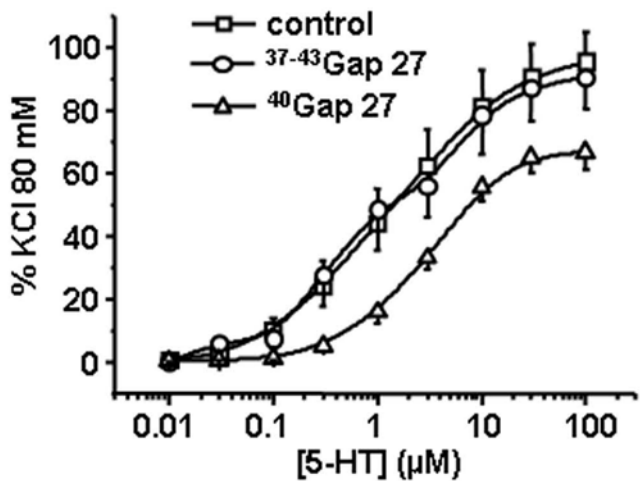**C**

Monocrotaline

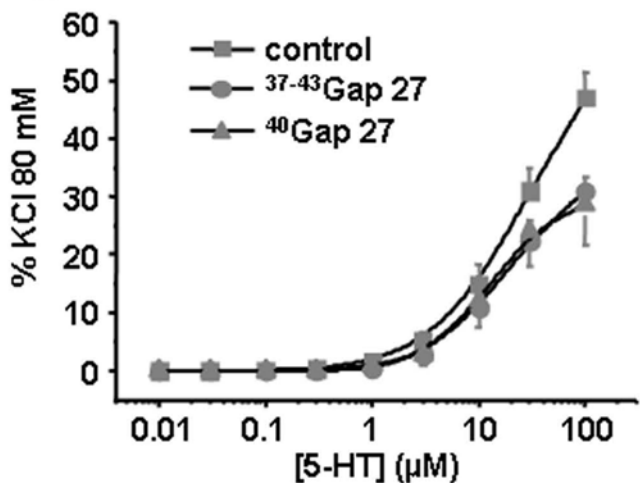

Supplement: MOESM4 [file 9425540]
